# Supplementary material for: Slow magnetic relaxation and selective luminescent probe in a 2p–3d–4f heterotrispin chain
Source: Royal Society of Chemistry journal article supplement (doi:10.1039/d2ce01200f), 2022-11-29
Supplement: d2ce01200f1.pdf [file d2ce01200f1.pdf]

## Supporting Information

### Slow magnetic relaxation and selective luminescent probe in 2p–3d–4f heterotriscipin chain

Mei Zhu,<sup>\*a</sup> Shuqi Ma,<sup>a</sup> Huiyang Dong,<sup>a</sup> Qing Zhong<sup>a</sup> and Yi Liu<sup>a</sup>

<sup>a</sup>Department of Chemistry, Key Laboratory of Surface & Interface Science of Polymer Materials of Zhejiang Province, Zhejiang Sci-Tech University, Hangzhou, 310018, China

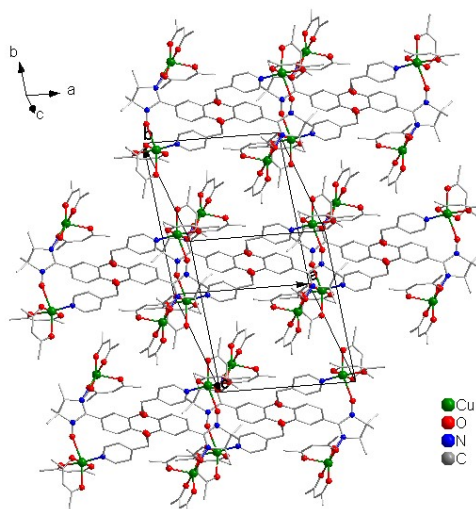

Fig. S1 Packing arrangement of 1 (H and F atoms are omitted for clarity).

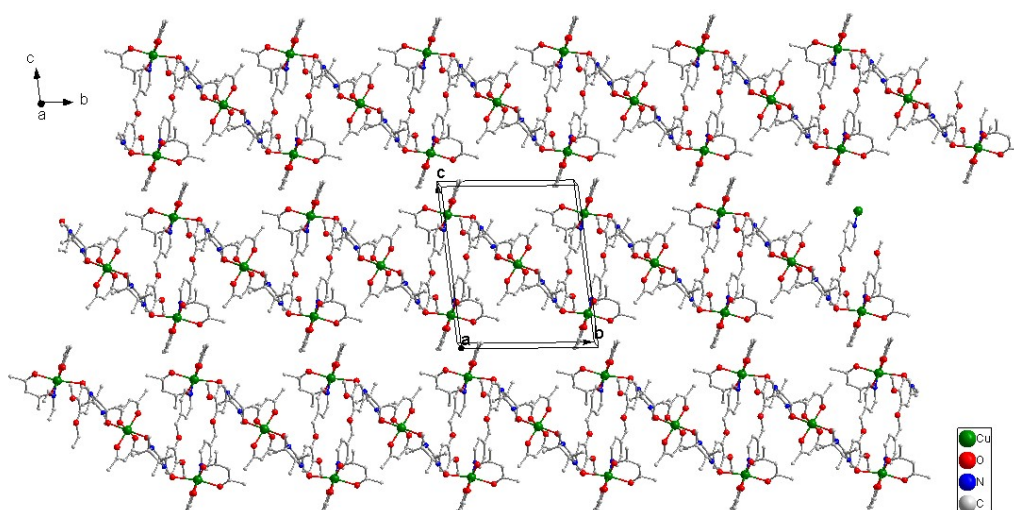

Fig. S2 Packing arrangement of 2 (H and F atoms are omitted for clarity).

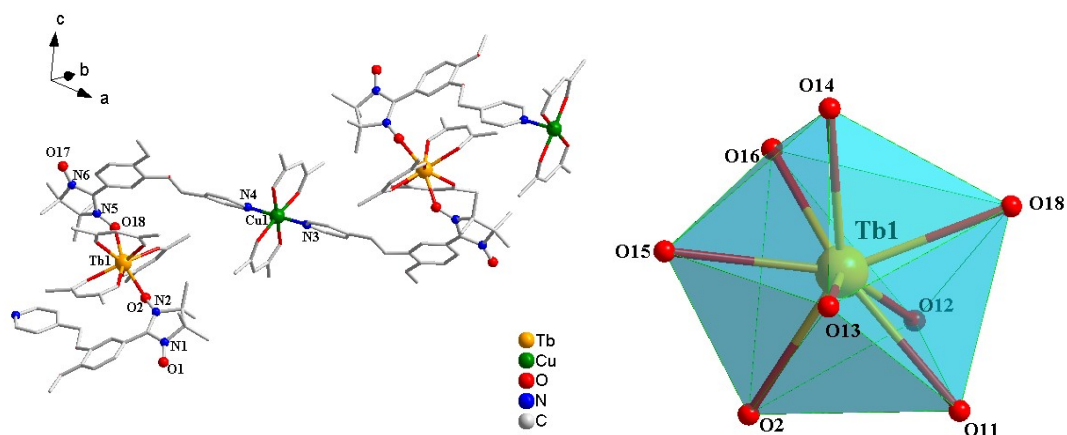

**Fig. S3** (left) One-dimensional chain of **4**. (right) coordination polyhedron of a Tb<sup>III</sup> ion (fluorine and hydrogen atoms are omitted).

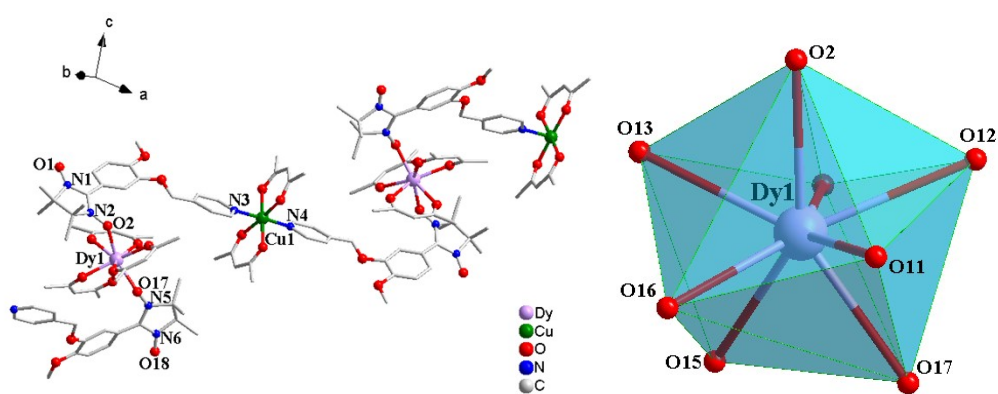

**Fig. S4** (left) One-dimensional chain of **5**. (right) coordination polyhedron of a Dy<sup>III</sup> ion (fluorine and hydrogen atoms are omitted).

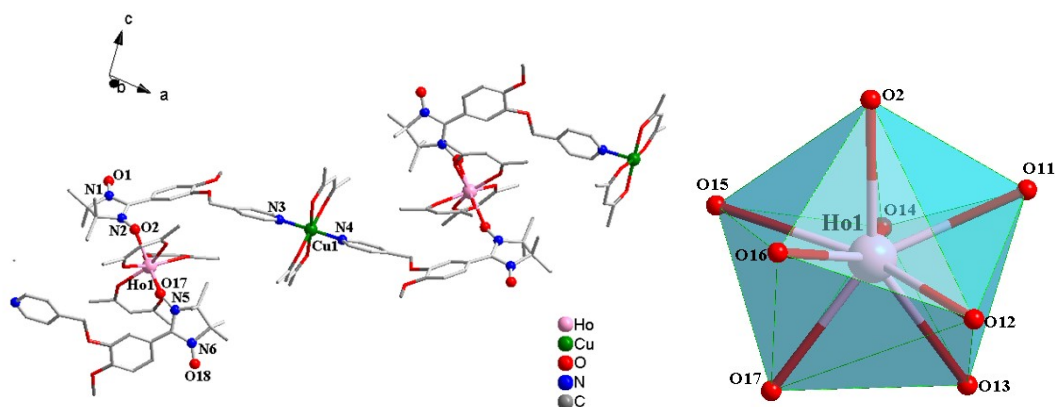

**Fig. S5** (left) One-dimensional chain of **6**. (right) coordination polyhedron of a Ho<sup>III</sup> ion (fluorine and hydrogen atoms are omitted).

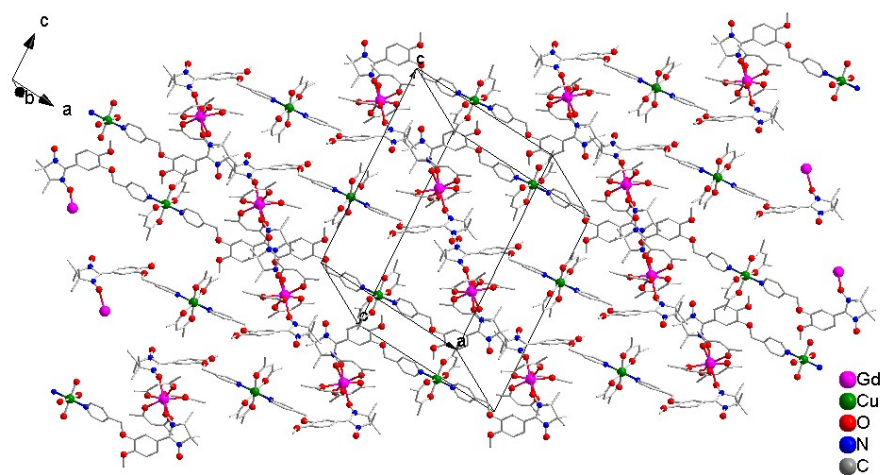

**Fig. S6** Packing arrangement of **3** (H and F atoms are omitted for clarity).

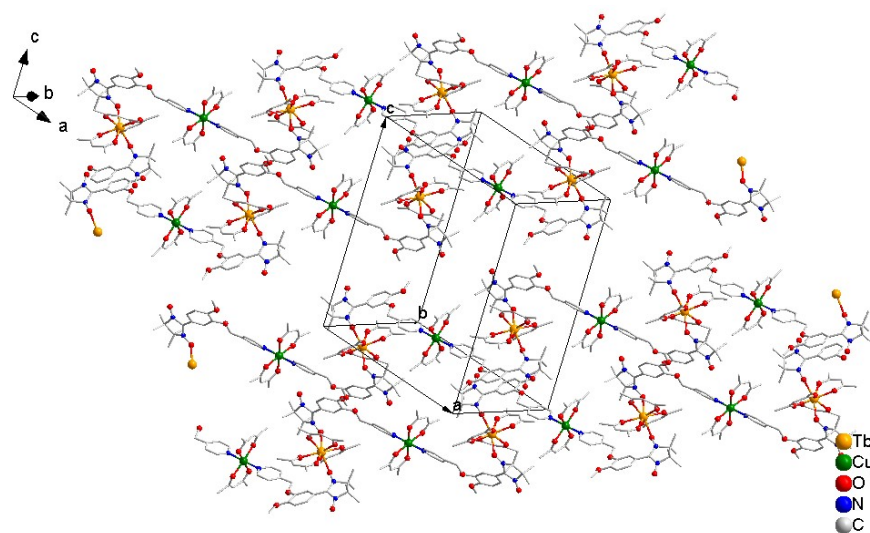

**Fig. S7** Packing arrangement of **4** (H and F atoms are omitted for clarity).

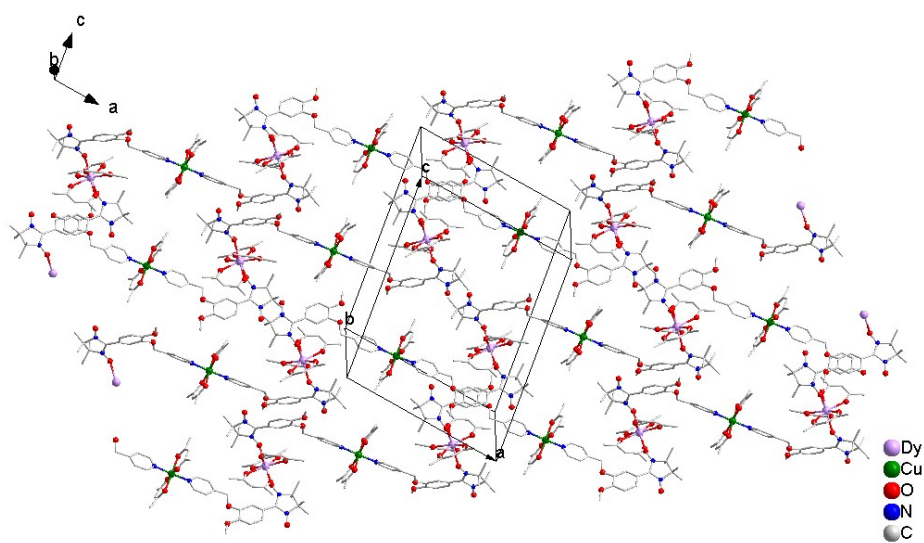

**Fig. S8** Packing arrangement of **5** (H and F atoms are omitted for clarity).

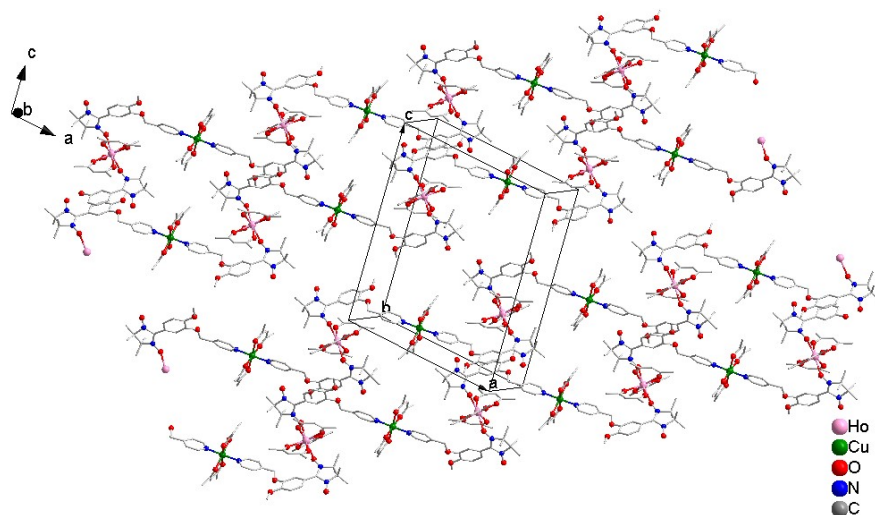

**Fig. S9** Packing arrangement of **6** (H and F atoms are omitted for clarity).

**Table S1** Selected bond lengths [ $\text{\AA}$ ] and angles [ $^\circ$ ] for **1**.

| <i>Bond distances</i> |            |                    |            |
|-----------------------|------------|--------------------|------------|
| Cu (2)-O(2)           | 1.945(4)   | Cu (1)-O(5)        | 1.942(4)   |
| Cu (2)-O(3)           | 1.981(4)   | Cu (1)-O(8)        | 2.193(5)   |
| Cu (2)-N(3)           | 2.019(5)   | Cu (1)-O(9)        | 1.900(4)   |
| Cu (2)-O(6)           | 1.955(4)   | Cu (1)-O(10)       | 1.913(4)   |
| Cu (2)-O(7)           | 2.214(5)   | O (12)-N(1)        | 2.232(7)   |
| Cu(2)-O(12)           | 2.6123(7)  | O (5)-N(2)         | 1.270(7)   |
| Cu (1)-O(4)           | 1.989(4)   |                    |            |
| <i>Angles</i>         |            |                    |            |
| O(2)-Cu (2)-O(3)      | 91.06(17)  | O(5)- Cu (1)-O(4)  | 160.65(18) |
| O(2)- Cu (2)-N(3)     | 90.15(18)  | O(5)- Cu (1)-O(8)  | 107.58(18) |
| O(2)- Cu (2)-O(6)     | 177.21(17) | O(9)- Cu (1)-O(4)  | 90.16(18)  |
| O(2)- Cu (2)-O(7)     | 91.71(17)  | O(9)- Cu (1)-O(5)  | 94.17(19)  |
| O(3)- Cu (2)-N(3)     | 173.48(19) | O(9)- Cu (1)-O(8)  | 91.7(2)    |
| O(3)- Cu (2)-O(7)     | 86.66(18)  | O(9)- Cu (1)-O(10) | 177.3(2)   |
| N(3)- Cu (2)-O(7)     | 99.71(18)  | O(10)- Cu (1)-O(4) | 92.18(17)  |
| O(6)- Cu (2)-O(3)     | 86.29(17)  | O(10)- Cu (1)-O(5) | 83.16(18)  |
| O(6)- Cu (2)-N(3)     | 92.39(19)  | O(10)- Cu (1)-O(8) | 89.4(2)    |
| O(6)- Cu (2)-O(7)     | 89.01(19)  | N(2)- O (5)-Cu(1)  | 119.2(4)   |
| O(4)- Cu (1)-O(8)     | 91.08(18)  |                    |            |

**Table S2** Selected bond lengths [ $\text{\AA}$ ] and angles [ $^\circ$ ] for **2**.

| <i>Bond distances</i> |          |             |          |
|-----------------------|----------|-------------|----------|
| Cu (1)-O(2)           | 1.957(3) | Cu (2)-O(8) | 1.942(3) |
| Cu (1)-O(4)           | 2.249(4) | O(1)-N(1)   | 1.285(5) |

|                     |            |                       |            |
|---------------------|------------|-----------------------|------------|
| Cu (1)-O(6)         | 1.952(3)   | O (10)-N(3)           | 1.273(5)   |
| Cu (1)-N(2)         | 2.021(4)   | Cu (2)-O(7)           | 1.947(3)   |
| Cu (2)-O(1)         | 2.369(3)   |                       |            |
| <i>Angles</i>       |            |                       |            |
| O(2)-Cu (1)-O(4)    | 90.40(13)  | O(7)- Cu (2)-O(1)#1   | 87.00(13)  |
| O(2)- Cu (1)-N(2)   | 91.03(15)  | O(7)- Cu (2)-O(1)     | 93.00(13)  |
| O(6)- Cu (1)-O(2)   | 177.48(14) | O(7)#1- Cu (2)-O(1)   | 87.00(13)  |
| O(6)- Cu (1)-O(4)   | 88.59(14)  | O(7)#1- Cu (2)-O(1)#1 | 93.00(13)  |
| O(6)- Cu (1)-O(9)   | 85.76(14)  | O(7)- Cu (2)-O(7)#1   | 180.00(16) |
| O(6)- Cu (1)-N(2)   | 91.24(15)  | O(8)#1- Cu (2)-O(1)#1 | 92.94(13)  |
| O(9)- Cu (1)-O(2)   | 92.00(14)  | O(8)#1- Cu (2)-O(1)   | 87.06(13)  |
| O(9)- Cu (1)-O(4)   | 93.64(14)  | O(8)- Cu (2)-O(7)#1   | 86.93(14)  |
| O(9)- Cu (1)-N(2)   | 176.72(15) | O(8)- Cu (2)-O(7)     | 93.07(14)  |
| N(2)- Cu (1)-O(4)   | 87.59(15)  | O(8)#1- Cu (2)-O(7)#1 | 93.07(14)  |
| O(1)#1- Cu (2)-O(1) | 180.0      | O(8)#1- Cu (2)-O(7)   | 86.93(14)  |
| O(8)#1-Cu(2)-O(8)   | 180.0      | N(1)-O(1)-Cu(2)       | 143.83(3)  |

**Table S3** Selected bond lengths [ $\text{\AA}$ ] and angles [ $^\circ$ ] for **3**.

|                       |            |                    |           |
|-----------------------|------------|--------------------|-----------|
| <i>Bond distances</i> |            |                    |           |
| Gd (1)-O(13)          | 2.428(5)   | Cu (1)-O(7)        | 1.999(7)  |
| Gd (1)-O(14)          | 2.407(5)   | Cu (1)-N(3)        | 1.984(6)  |
| Gd (1)-O(15)          | 2.352(6)   | Cu (1)-N(4)        | 1.993(6)  |
| Gd (1)-O(12)          | 2.359(5)   | Cu (1)-O(6)        | 2.259(7)  |
| Gd (1)-O(16)          | 2.407(6)   | Cu (1)-O(8)        | 2.232(7)  |
| Gd (1)-O(18)          | 2.350(6)   | O (12)-N(6)        | 1.318(8)  |
| Gd (1)-O(2)           | 2.372(5)   | O (2)-N(2)         | 1.309(8)  |
| Gd (1)-O(17)          | 2.420(6)   | O (11)-N(5)        | 1.258(10) |
| Cu (1)-O(5)           | 2.011(6)   | O (1)-N(1)         | 1.262(8)  |
| <i>Angles</i>         |            |                    |           |
| O(14)-Gd (1)-O(13)    | 72.7(2)    | O(18)-Gd (1)-O(13) | 147.5(2)  |
| O(14)-Gd (1)-O(17)    | 128.3(2)   | O(18)-Gd (1)-O(14) | 74.9(2)   |
| O(15)-Gd (1)-O(13)    | 76.92(19)  | O(18)-Gd (1)-O(15) | 135.6(2)  |
| O(15)-Gd (1)-O(14)    | 149.3(2)   | O(18)-Gd (1)-O(12) | 94.9(2)   |
| O(15)-Gd (1)-O(12)    | 98.89(18)  | O(18)-Gd (1)-O(16) | 73.3(2)   |
| O(15)-Gd (1)-O(16)    | 72.56(19)  | O(18)-Gd (1)-O(2)  | 99.6(2)   |
| O(15)-Gd (1)-O(2)     | 95.86(19)  | O(18)-Gd (1)-O(17) | 72.7(2)   |
| O(15)-Gd (1)-O(17)    | 71.3(2)    | O(17)-Gd (1)-O(13) | 132.1(2)  |
| O(12)-Gd (1)-O(13)    | 77.32(19)  | O(5)-Cu (1)-O(6)   | 86.8(3)   |
| O(12)-Gd (1)-O(14)    | 70.40(19)  | O(5)-Cu (1)-O(8)   | 91.7(3)   |
| O(12)-Gd (1)-O(16)    | 147.54(19) | N(3)-Cu (1)-O(5)   | 92.1(3)   |
| O(12)-Gd (1)-O(2)     | 140.7(2)   | N(3)-Cu (1)-O(7)   | 89.5(3)   |

|                    |            |                  |          |
|--------------------|------------|------------------|----------|
| O(12)-Gd (1)-O(17) | 73.4(2)    | N(3)-Cu (1)-O(6) | 88.1(3)  |
| O(16)-Gd (1)-O(13) | 128.16(19) | N(3)-Cu (1)-O(8) | 87.9(3)  |
| O(16)-Gd (1)-O(14) | 131.37(19) | N(3)-Cu (1)-O(4) | 178.6(3) |
| O(16)-Gd (1)-O(17) | 74.2(2)    | O(7)-Cu (1)-O(5) | 178.1(3) |
| O(2)-Gd (1)-O(13)  | 70.87(18)  | O(7)-Cu (1)-O(6) | 94.2(3)  |
| O(2)-Gd (1)-O(14)  | 78.41(19)  | O(7)-Cu (1)-O(8) | 87.4(3)  |
| O(2)-Gd (1)-O(16)  | 71.77(19)  | O(8)-Cu (1)-O(6) | 175.7(2) |
| O(2)-Gd (1)-O(17)  | 145.8(2)   | N(4)-Cu (1)-O(5) | 89.2(3)  |
| N(6) -O(12) -Gd(1) | 134.7(5)   | N(4)-Cu (1)-O(7) | 89.1(3)  |
| N(2)-O(2)-Gd(1)    | 134.7(5)   | N(4)-Cu (1)-O(6) | 92.4(3)  |
| N(4)-Cu (1)-O(8)   | 91.7(3)    |                  |          |

**Table S4** Selected bond lengths [ $\text{\AA}$ ] and angles [ $^\circ$ ] for **4**.

| <i>Bond distances</i> |            |                    |            |
|-----------------------|------------|--------------------|------------|
| Tb (1)-O(13)          | 2.330(5)   | Cu (1)-O(7)        | 2.267(6)   |
| Tb (1)-O(14)          | 2.398(6)   | Cu (1)-N(3)        | 1.996(6)   |
| Tb (1)-O(15)          | 2.379(5)   | Cu (1)-N(4)        | 1.990(6)   |
| Tb (1)-O(12)          | 2.406(5)   | Cu (1)-O(6)        | 2.011(6)   |
| Tb (1)-O(16)          | 2.344(5)   | Cu (1)-O(8)        | 2.022(6)   |
| Tb (1)-O(18)          | 2.347(5)   | O (18)-N(5)        | 1.304(7)   |
| Tb (1)-O(2)           | 2.364(5)   | O (2)-N(2)         | 1.306(7)   |
| Tb (1)-O(11)          | 2.393(5)   | O (17)-N(6)        | 1.262(8)   |
| Cu (1)-O(5)           | 2.248(6)   | O (1)-N(1)         | 1.265(8)   |
| <i>Angles</i>         |            |                    |            |
| O(14)-Tb (1)-O(13)    | 72.6(2)    | O(18)-Tb (1)-O(11) | 70.51(17)  |
| O(11)-Tb (1)-O(12)    | 72.88 (17) | O(18)-Tb (1)-O(14) | 73.68(18)  |
| O(15)-Tb (1)-O(13)    | 73.18(18)  | O(18)-Tb (1)-O(15) | 147.56(18) |
| O(15)-Tb (1)-O(14)    | 73.99(19)  | O(18)-Tb (1)-O(12) | 77.29(16)  |
| O(15)-Tb (1)-O(12)    | 128.51(17) | O(18)-Tb (1)-O(16) | 98.81(17)  |
| O(15)-Tb (1)-O(16)    | 73.13(17)  | O(18)-Tb (1)-O(2)  | 140.81(17) |
| O(15)-Tb (1)-O(2)     | 71.61(17)  | O(18)-Tb (1)-O(13) | 94.68(18)  |
| O(11)-Tb (1)-O(14)    | 128.26(18) | O(11)-Tb (1)-O(13) | 74.41(18)  |
| O(12)-Tb (1)-O(13)    | 147.15(18) | O(5)-Cu (1)-O(6)   | 87.1(2)    |
| O(12)-Tb (1)-O(14)    | 132.44(18) | O(5)-Cu (1)-O(8)   | 92.0(2)    |
| O(12)-Tb (1)-O(16)    | 76.87(17)  | N(3)-Cu (1)-O(5)   | 88.2(2)    |
| O(12)-Tb (1)-O(2)     | 70.94(16)  | N(3)-Cu (1)-O(7)   | 88.6(2)    |
| O(16)-Tb (1)-O(11)    | 149.43(17) | N(3)-Cu (1)-O(6)   | 90.0(2)    |
| O(16)-Tb (1)-O(13)    | 135.98(19) | N(3)-Cu (1)-O(8)   | 91.7(2)    |
| O(16)-Tb (1)-O(14)    | 71.43(19)  | N(4)-Cu (1)-O(8)   | 89.3(2)    |
| O(2)-Tb (1)-O(11)     | 78.54(17)  | O(7)-Cu (1)-O(5)   | 176.4(2)   |
| O(2)-Tb (1)-O(13)     | 99.64(18)  | O(7)-Cu (1)-O(6)   | 94.5(2)    |

|                    |            |                  |          |
|--------------------|------------|------------------|----------|
| O(2)-Tb (1)-O(14)  | 145.48(18) | O(7)-Cu (1)-O(8) | 86.5(2)  |
| O(2)-Tb (1)-O(16)  | 95.77(17)  | O(8)-Cu (1)-O(6) | 178.0(2) |
| O(15)-Tb (1)-O(11) | 130.78(16) | N(4)-Cu (1)-O(5) | 91.3(2)  |
| N(5) -O(18) -Tb(1) | 135.5(4)   | N(4)-Cu (1)-O(7) | 92.0(2)  |
| N(2)-O(2)-Tb(1)    | 134.5(4)   | N(4)-Cu (1)-O(6) | 88.9 (2) |
| N(4)-Cu (1)-O(8)   | 89.3(2)    |                  |          |

**Table S5** Selected bond lengths [ $\text{\AA}$ ] and angles [ $^\circ$ ] for **5**.

| <i>Bond distances</i> |            |                     |           |
|-----------------------|------------|---------------------|-----------|
| Dy (1)-O(12)          | 2.404(6)   | Cu (1)-O(7)         | 2.242(7)  |
| Dy (1)-O(17)          | 2.335(6)   | Cu (1)-N(3)         | 1.987(6)  |
| Dy (1)-O(11)          | 2.404(6)   | Cu (1)-N(4)         | 1.992(7)  |
| Dy (1)-O(2)           | 2.354(6)   | Cu (1)-O(6)         | 2.017(7)  |
| Dy (1)-O(13)          | 2.392(6)   | Cu (1)-O(8)         | 2.002(7)  |
| Dy (1)-O(14)          | 2.328(6)   | O (17)-N(5)         | 1.313(8)  |
| Dy (1)-O(16)          | 2.324(6)   | O (2)-N(2)          | 1.307(8)  |
| Dy (1)-O(15)          | 2.401(7)   | O (18)-N(6)         | 1.251(10) |
| Cu (1)-O(6)           | 2.017(7)   | O (1)-N(1)          | 1.254(9)  |
| <i>Angles</i>         |            |                     |           |
| O(17)- Dy (1)-O(12)   | 77.2(2)    | O(16)- Dy (1)-O(17) | 95.3(2)   |
| O(17)- Dy (1)-O(11)   | 70.55(19)  | O(16)- Dy (1)-O(11) | 74.6(2)   |
| O(17)- Dy (1)-O(2)    | 140.4(2)   | O(16)- Dy (1)-O(2)  | 99.2(2)   |
| O(17)- Dy (1)-O(13)   | 148.1(2)   | O(16)- Dy (1)-O(13) | 73.3(2)   |
| O(17)- Dy (1)-O(15)   | 73.5(2)    | O(16)- Dy (1)-O(14) | 136.3(2)  |
| O(11)- Dy (1)-O(12)   | 73.1(2)    | O(16)- Dy (1)-O(15) | 73.4(2)   |
| O(2)- Dy (1)-O(12)    | 70.81(19)  | O(15)- Dy (1)-O(12) | 131.7(2)  |
| O(2)- Dy (1)-O(11)    | 78.18(19)  | O(15)- Dy (1)-O(11) | 128.5(2)  |
| O(2)- Dy (1)-O(13)    | 71.5(2)    | O(5)-Cu (1)-O(6)    | 87.0(3)   |
| O(2)- Dy (1)-O(15)    | 146.0(2)   | O(6)-Cu (1)-O(7)    | 91.9(3)   |
| O(13)- Dy (1)-O(12)   | 127.7(2)   | N(3)-Cu (1)-O(5)    | 87.9(3)   |
| O(13)- Dy (1)-O(11)   | 130.89(19) | N(3)-Cu (1)-O(7)    | 88.0(3)   |
| O(13)- Dy (1)-O(15)   | 74.6(2)    | N(3)-Cu (1)-O(8)    | 89.8(3)   |
| O(14)- Dy (1)-O(12)   | 76.1(2)    | N(3)-Cu (1)-O(4)    | 178.5(3)  |
| O(14)- Dy (1)-O(17)   | 98.2(2)    | N(4)-Cu (1)-O(6)    | 89.4(3)   |
| O(14)- Dy (1)-O(11)   | 148.9(2)   | O(7)-Cu (1)-O(5)    | 175.7(2)  |
| O(14)- Dy (1)-O(2)    | 96.2(2)    | O(8)-Cu (1)-O(6)    | 177.9(3)  |
| O(14)- Dy (1)-O(13)   | 73.4(2)    | O(5)-Cu (1)-O(8)    | 94.1(3)   |
| O(14)- Dy (1)-O(15)   | 71.2(2)    | O(8)-Cu (1)-O(7)    | 87.2(3)   |
| O(16)- Dy (1)-O(12)   | 147.5(2)   | N(4)-Cu (1)-O(5)    | 92.4(3)   |
| N(5) -O(17) - Dy (1)  | 135.7(5)   | N(4)-Cu (1)-O(7)    | 91.7(3)   |
| N(2)-O(2)- Dy (1)     | 135.0(5)   | N(4)-Cu (1)-O(8)    | 88.7(3)   |

---

|                  |         |
|------------------|---------|
| N(3)-Cu (1)-O(6) | 92.1(3) |
|------------------|---------|

---

**Table S6** Selected bond lengths [ $\text{\AA}$ ] and angles [ $^\circ$ ] for **6**.

---

*Bond distances*

---

|              |          |             |          |
|--------------|----------|-------------|----------|
| Ho (1)-O(16) | 2.376(4) | Cu (1)-O(8) | 2.027(5) |
| Ho (1)-O(17) | 2.321(4) | Cu (1)-N(4) | 1.996(5) |
| Ho (1)-O(11) | 2.371(4) | Cu (1)-O(6) | 2.000(5) |
| Ho (1)-O(12) | 2.329(5) | Cu (1)-O(7) | 2.253(6) |
| Ho (1)-O(2)  | 2.337(4) | Cu (1)-O(5) | 2.238(6) |
| Ho (1)-O(15) | 2.374(5) | O (17)-N(5) | 1.309(6) |
| Ho (1)-O(14) | 2.314(5) | O (2)-N(2)  | 1.313(6) |
| Ho (1)-O(13) | 2.391(5) | O (18)-N(6) | 1.267(8) |
| Cu (1)-N(3)  | 1.995(5) | O (1)-N(1)  | 1.267(7) |

---

*Angles*

---

|                      |            |                     |            |
|----------------------|------------|---------------------|------------|
| O(16)- Ho (1)-O(13)  | 131.30(17) | O(15)- Ho (1)-O(13) | 128.05(16) |
| O(17)- Ho (1)-O(16)  | 77.33(15)  | O(14)- Ho (1)-O(16) | 147.46(17) |
| O(17)- Ho (1)-O(11)  | 147.44(15) | O(14)- Ho (1)-O(17) | 94.58(16)  |
| O(17)- Ho (1)-O(12)  | 98.70(16)  | O(14)- Ho (1)-O(11) | 73.24(16)  |
| O(17)- Ho (1)-O(2)   | 140.62(16) | O(14)- Ho (1)-O(12) | 136.74(18) |
| O(17)- Ho (1)-O(15)  | 70.53(15)  | O(14)- Ho (1)-O(2)  | 99.33(16)  |
| O(17)- Ho (1)-O(13)  | 73.14(16)  | O(14)- Ho (1)-O(15) | 73.86(17)  |
| O(11)- Ho (1)-O(16)  | 128.42(15) | O(14)- Ho (1)-O(13) | 73.40(18)  |
| O(11)- Ho (1)-O(15)  | 130.58(15) | O(8)-Cu (1)-O(7)    | 86.8(2)    |
| O(11)- Ho (1)-O(13)  | 74.43(16)  | O(8)-Cu (1)-O(5)    | 92.0(2)    |
| O(12)- Ho (1)-O(16)  | 75.79(16)  | N(3)-Cu (1)-O(4)    | 178.9(2)   |
| O(12)- Ho (1)-O(11)  | 73.58(16)  | N(3)-Cu (1)-O(6)    | 89.9(2)    |
| O(12)- Ho (1)-O(2)   | 95.93(15)  | N(3)-Cu (1)-O(7)    | 87.9(2)    |
| O(12)- Ho (1)-O(15)  | 149.22(16) | N(3)-Cu (1)-O(5)    | 88.4(2)    |
| O(12)- Ho (1)-O(13)  | 71.54(17)  | N(4)-Cu (1)-O(8)    | 89.3(2)    |
| O(2)- Ho (1)-O(16)   | 71.18(15)  | O(6)-Cu (1)-O(8)    | 177.9(2)   |
| O(2)- Ho (1)-O(11)   | 71.91(15)  | O(6)-Cu (1)-O(7)    | 94.6(2)    |
| O(2)- Ho (1)-O(15)   | 78.28(15)  | O(6)-Cu (1)-O(5)    | 86.8(2)    |
| O(2)- Ho (1)-O(13)   | 146.21(16) | O(5)-Cu (1)-O(7)    | 176.12(19) |
| O(15)- Ho (1)-O(16)  | 73.73(17)  | N(4)-Cu (1)-O(6)    | 89.0(2)    |
| N(5) -O(17) - Ho (1) | 135.3(4)   | N(4)-Cu (1)-O(7)    | 92.1(2)    |
| N(2)-O(2)- Ho (1)    | 135.1(4)   | N(4)-Cu (1)-O(5)    | 91.6(2)    |
| N(3)-Cu (1)-O(8)     | 91.8(2)    |                     |            |

---



**Table S7** SHAPE Analysis for the Ln Coordination Spheres

| Compound | SAPR-8 | TDD-8        | JBTPR-8 | BTPR-8 | JSD-8 |
|----------|--------|--------------|---------|--------|-------|
| Gd       | 2.867  | <b>0.126</b> | 3.158   | 2.695  | 2.601 |
| Tb       | 2.829  | <b>0.122</b> | 3.144   | 2.648  | 2.657 |
| Dy       | 2.911  | <b>0.121</b> | 3.165   | 2.691  | 2.572 |
| Ho       | 2.790  | <b>0.105</b> | 3.154   | 2.666  | 2.638 |

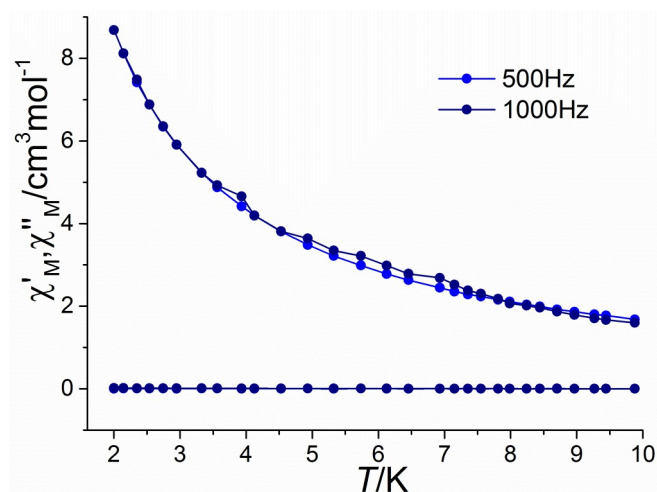**Fig. S10** Temperature dependence of the in-phase and out-of-phase components of the ac magnetic susceptibility for complex 3 in zero dc fields with an oscillation of 3Oe.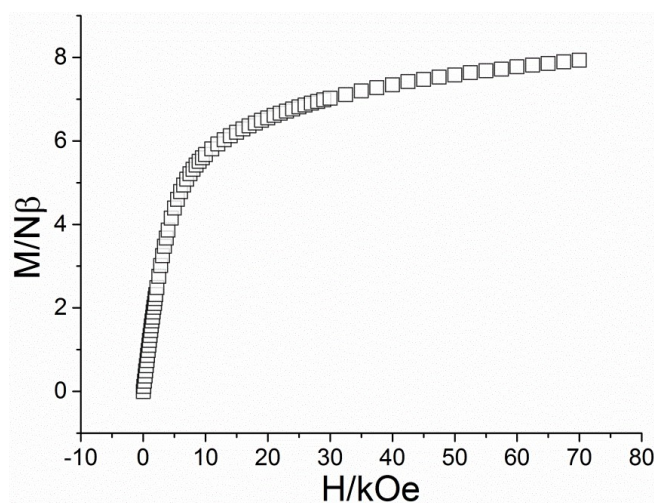**Fig. S11** The M vs. H plots of complex 4.

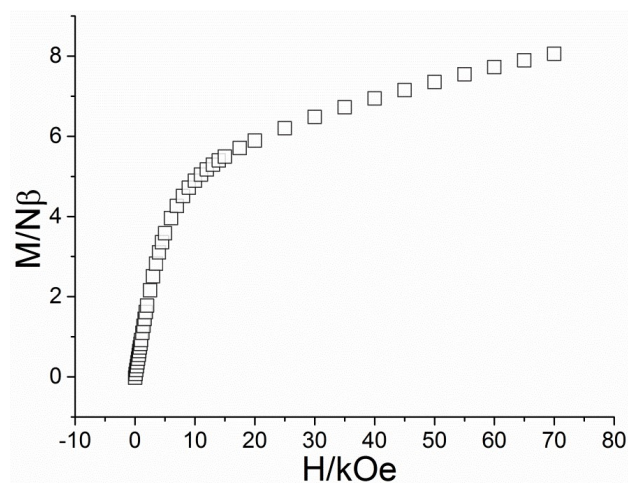

**Fig. S12** The M vs. H plots of complex **5**.

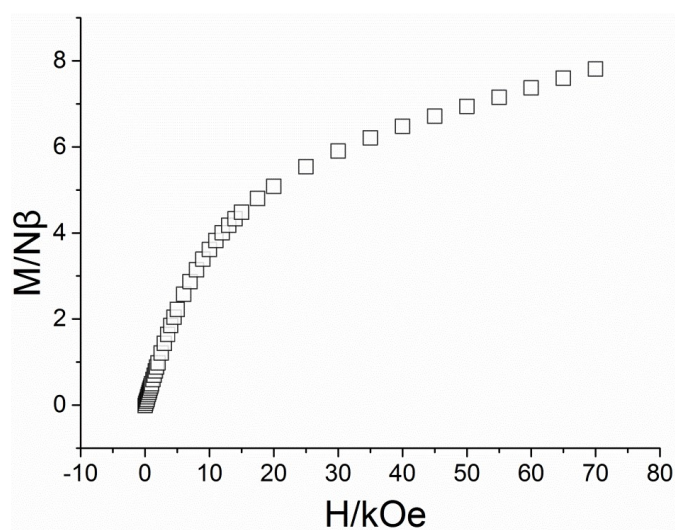

**Fig. S13** The M vs. H plots of complex **6**.

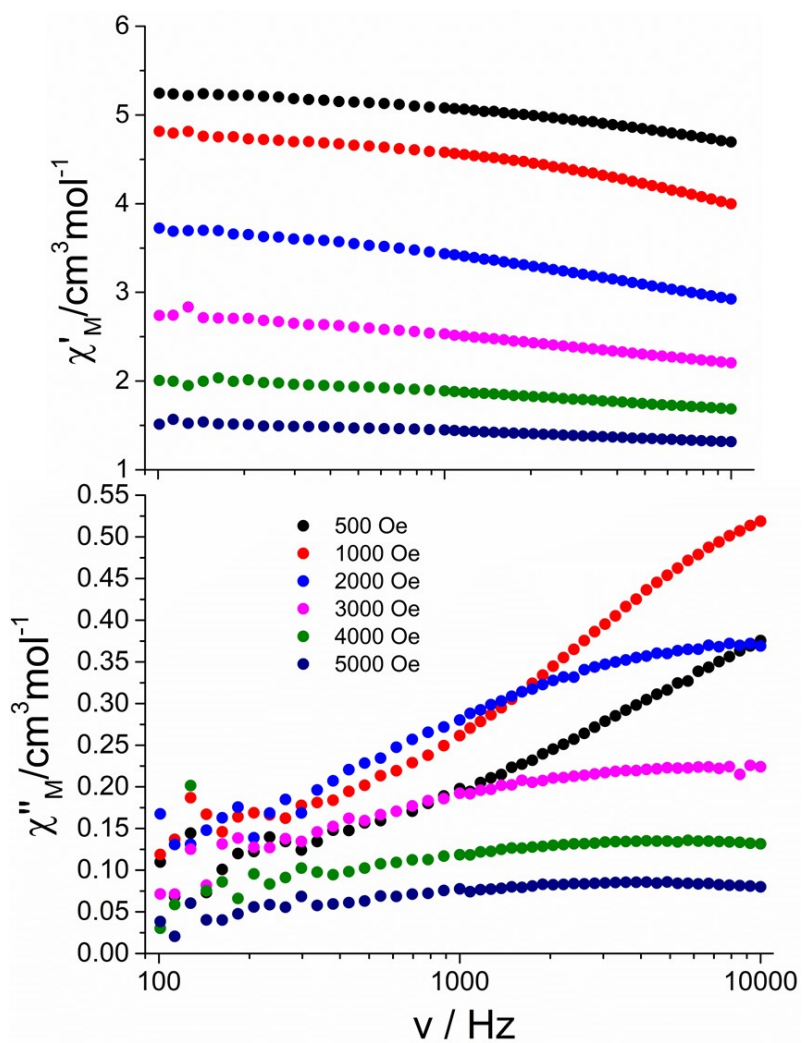

**Fig. S14** Frequency dependence of the  $\chi'$  (top) and  $\chi''$  (bottom) components of the ac susceptibility, between 500 and 5000 Oe and between 100 and 10000 Hz, for **5** at 2 K.

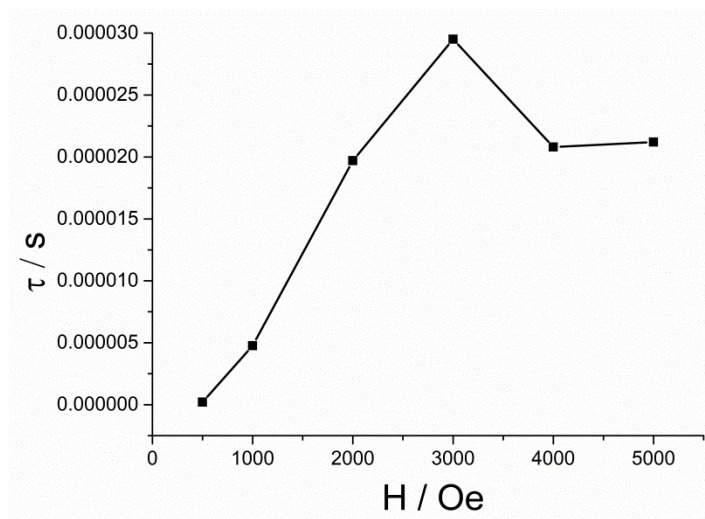

**Fig. S15** The  $\tau$  versus  $H$  plot for complex **5** at 2.0 K under the applied dc field

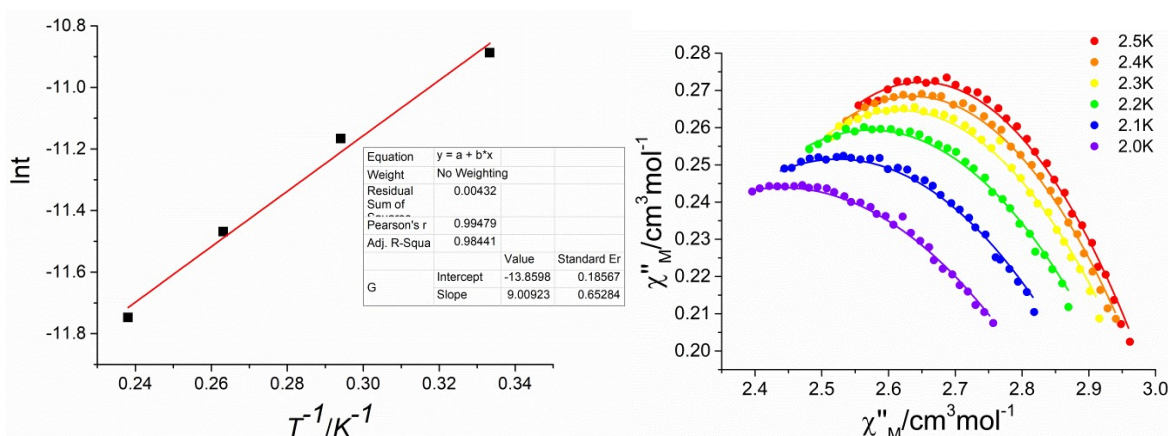

**Fig. 16** (left) Plots of  $\ln\tau$  versus  $T^{-1}$  fitting to the Arrhenius law for complex **5**. (right) Cole–Cole plots for complex **5** (The solid lines represent the fitting result).

**Table S8** Best fitted parameters ( $\chi_T$ ,  $\chi_S$ ,  $\tau$  and  $\alpha$ ) with the extended Debye model for complex **5** under 3000 dc field in the temperature range 2.0–2.5 K.

| T/K | $\chi_S/\text{cm}^3\text{mol}^{-1}$ | $\chi_T/\text{cm}^3\text{mol}^{-1}$ | $\tau/\text{s}$       | $\alpha$ | R                     |
|-----|-------------------------------------|-------------------------------------|-----------------------|----------|-----------------------|
| 2.0 | 1.68421                             | 3.22059                             | $2.32 \times 10^{-5}$ | 0.60914  | $2.62 \times 10^{-4}$ |
| 2.1 | 1.78127                             | 3.25671                             | $2.55 \times 10^{-5}$ | 0.58085  | $2.33 \times 10^{-4}$ |
| 2.2 | 1.82891                             | 3.27394                             | $2.40 \times 10^{-5}$ | 0.55883  | $2.77 \times 10^{-4}$ |
| 2.3 | 1.97851                             | 3.25183                             | $2.84 \times 10^{-5}$ | 0.49825  | $2.75 \times 10^{-4}$ |
| 2.4 | 2.02687                             | 3.24463                             | $2.75 \times 10^{-5}$ | 0.47131  | $2.13 \times 10^{-4}$ |
| 2.5 | 2.15925                             | 3.21221                             | $2.91 \times 10^{-5}$ | 0.41217  | $2.17 \times 10^{-4}$ |

**Table S9** Magnetic relaxation parameters for  $\beta$ -diketone Dy(III) complexes possessing triangular dodecahedron ( $D_{2d}$ ) coordination spheres.

| Complex                                                                                                      | $U_{\text{eff}}/k_B$ (K) | $\tau_0$ (s)          | $\alpha$  | $H_{\text{dc}}$ (Oe) | Ref.      |
|--------------------------------------------------------------------------------------------------------------|--------------------------|-----------------------|-----------|----------------------|-----------|
| $[\text{Dy}_4(\text{hfac})_8(\text{IMPhThio})_2(\text{OH})_4][\text{Dy}(\text{hfac})_3(\text{NITPhThio})_2]$ | 32                       | $2.96 \times 10^{-9}$ | 0.50-0.15 | 5000                 | 31a       |
| $[\text{Dy}(\text{hfac})_3(\text{tmphen})]$                                                                  | 35.09                    | $9.16 \times 10^{-9}$ | 0.20-0.41 | 3500                 | 31b       |
| $[\text{Dy}(\text{thd})_2(\text{NO}_3)(\text{TPPO})_2]$                                                      | 20.7                     | $1.59 \times 10^{-6}$ | 0.12-0.23 | 1000                 | 31c       |
| $[\text{Dy}(\text{9Accm})_2(\text{NO}_3)(\text{dmf})_2]$                                                     | 23                       | $1.3 \times 10^{-6}$  | 0.3-0.4   | 1000                 | 31d       |
| $[\text{Dy}_2\text{Cu}_2(\text{hfac})_{10}(\text{NIT3py})_2(\text{H}_2\text{O})_2]$                          | 13.14                    | $1.77 \times 10^{-6}$ | --        | 2000                 | 31e       |
| $\{[\text{Cu}(\text{hfac})_2][(\text{NIT-4-OMe-4PyPh})_2[\text{Ln}(\text{hfac})_3]]\}_n$                     | 25                       | $9.56 \times 10^{-7}$ | 0.37-0.52 | 3000                 | This work |

NITPhThio = (2-(benzo[d]thiophen-2-yl)-4,4,5,5-tetramethylimidazolin-1-oxyl-3-oxide; IMPhThio = 2-(benzo[d]thiophen-2-yl)-4,4,5,5-tetramethylimidazolin-1-oxyl; tmphen = 3,4,7,8-tetramethyl-1,10-phenanthroline; thd = 2,2,6,6-tetramethyl-3,5-heptanedione; TPPO = triphenylphosphane oxide; 9Accm =

1,7-di-9-anthracene-6-heptadiene-3,5-dione; NIT-3py = 2-(3-pyridyl)-4,4,5,5-tetramethylimidazoline-1-oxyl-3-oxide.

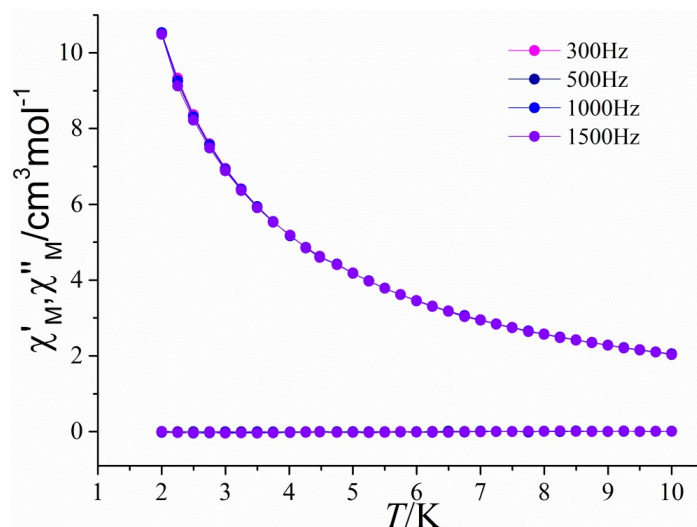

**Fig. S17** Temperature dependence of the in-phase and out-of-phase components of the ac magnetic susceptibility for complex **4** in zero dc fields with an oscillation of 3Oe.

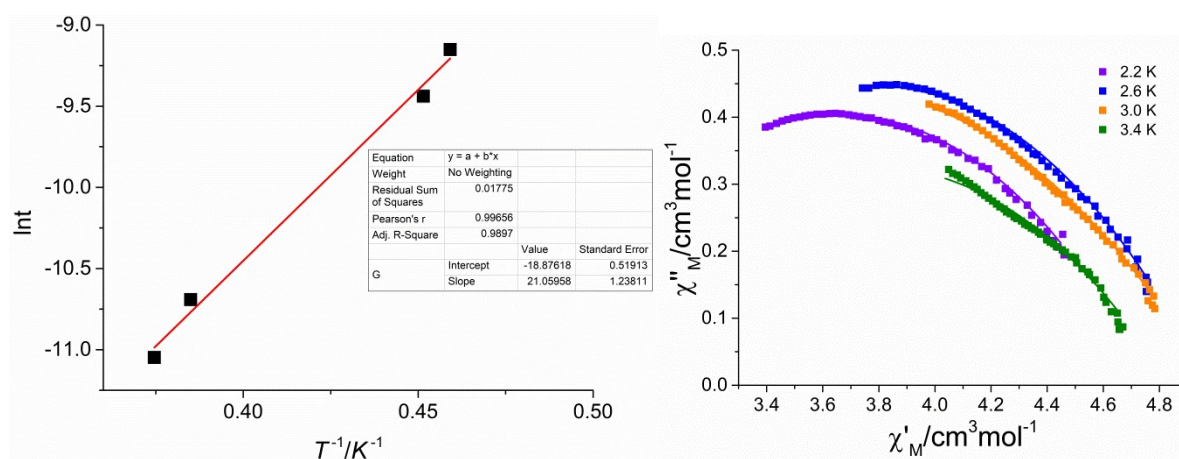

**Fig. S18** (left) Plots of  $\ln\tau$  versus  $T^{-1}$  fitting to the Arrhenius law for complex **4**. (right) Cole–Cole plots for complex **4** (The solid lines represent the fitting result).

**Table S10** Best fitted parameters ( $\chi_T$ ,  $\chi_S$ ,  $\tau$  and  $\alpha$ ) with the extended Debye model for complex **4** under 3000 dc field in the temperature of 2.2, 2.6, 3.0 and 3.4 K.

| T/K | $\chi_S/\text{cm}^3\text{mol}^{-1}$ | $\chi_T/\text{cm}^3\text{mol}^{-1}$ | $\tau/\text{s}$       | $\alpha$ | R                     |
|-----|-------------------------------------|-------------------------------------|-----------------------|----------|-----------------------|
| 2.2 | 2.47019                             | 4.79773                             | $3.93 \times 10^{-5}$ | 0.57582  | $3.39 \times 10^{-4}$ |
| 2.6 | 2.66141                             | 4.90636                             | $1.83 \times 10^{-5}$ | 0.51504  | $2.67 \times 10^{-4}$ |
| 3.0 | 2.16028                             | 4.94562                             | $3.90 \times 10^{-6}$ | 0.59319  | $2.82 \times 10^{-4}$ |
| 3.4 | 1.99236                             | 4.87279                             | $1.21 \times 10^{-6}$ | 0.67206  | $8.71 \times 10^{-4}$ |

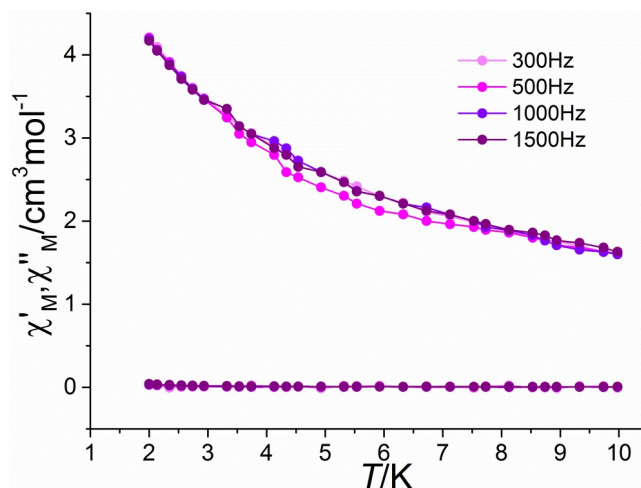

**Fig. S19** Temperature dependence of the in-phase and out-of-phase components of the ac magnetic susceptibility for complex **6** in zero dc fields with an oscillation of 3Oe.

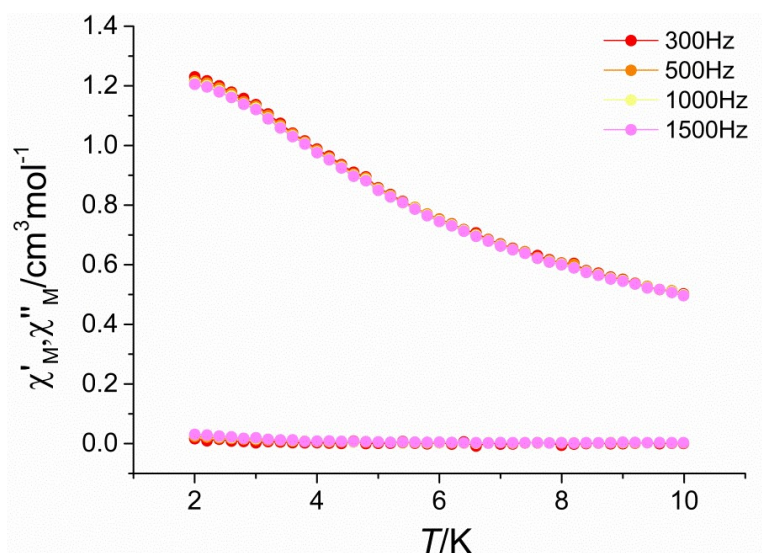

**Fig. S20** Temperature dependence of the in-phase and out-of-phase components of the ac magnetic susceptibility for complex **6** under 3000 Oe dc fields with an oscillation of 3Oe.

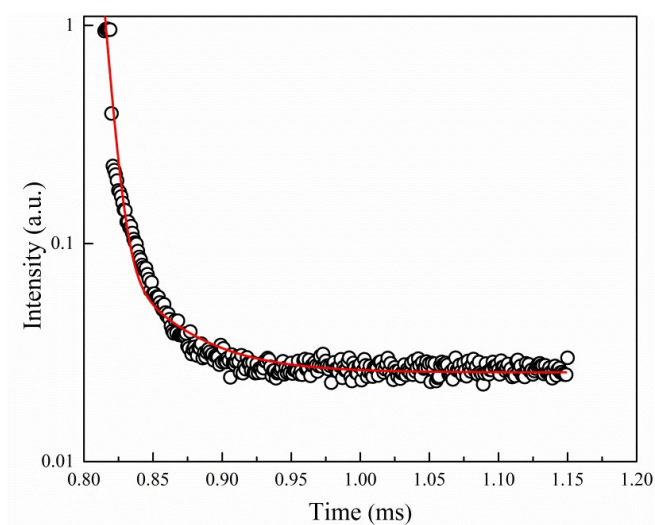

**Fig. S21** The fluorescence decay of complex **4** (solid-lines: fitting curves).

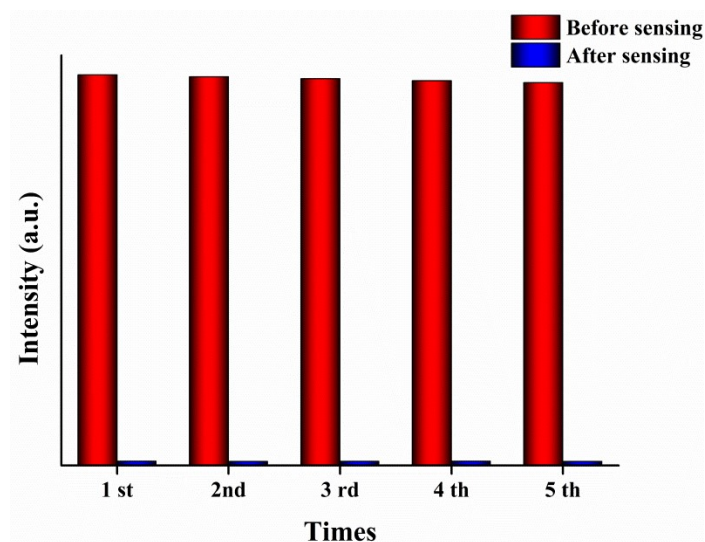

**Fig. S22** The luminescence intensity ( ${}^5D_4-{}^7F_5$ ) of five recyclable experiments of sensing for  $Fe^{3+}$  ion in aqueous solution

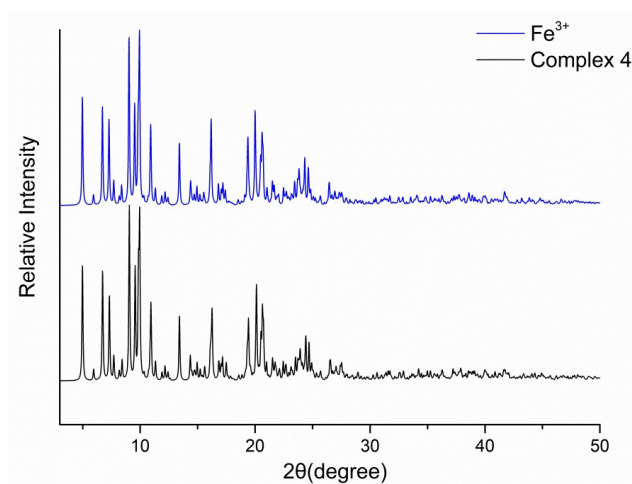

**Fig. S23** PXRD patterns of complex 4 after soaking in  $Fe^{3+}$  ion.

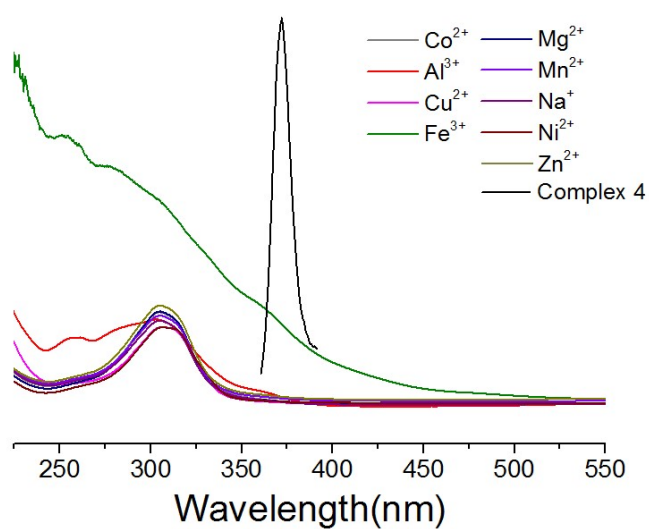

**Fig. S24** The UV-vis absorption spectra of metal anions aqueous solution with the same concentration of analytes (0.01 M) and the excitation spectra of complex 4.

**Table S11** Diverse properties for reported nitronyl nitroxide-based multifunctional molecular materials

| Complex                                                                                                                                               | Diverse properties    |                          |                | Ref.      |
|-------------------------------------------------------------------------------------------------------------------------------------------------------|-----------------------|--------------------------|----------------|-----------|
| [Tb(acac) <sub>3</sub> NIT2Py•0.5H <sub>2</sub> O]                                                                                                    | Luminescence          | SMM behavior             |                | 38 a      |
| Ln(hfac) <sub>3</sub> (NITPhOCF <sub>3</sub> ) <sub>2</sub> (LnIII = Tb, Dy)                                                                          | Thermodynamics        | Slow magnetic relaxation |                | 38 b      |
| [{Ln(hfac) <sub>3</sub> } <sub>3</sub> {Cu(hfac) <sub>2</sub> } <sub>3</sub> {NIT-Ph(OMe) <sub>2</sub> } <sub>4</sub> ] <sub>n</sub> (LnIII = Gd, Tb) | Magnetocaloric effect | Slow magnetic relaxation |                | 38 c      |
| [Ln(hfac) <sub>3</sub> (8-QNNIT)] <sub>n</sub> (LnIII = Tb, Dy)                                                                                       | Optical property      | SCM behavior             | Thermodynamics | 38 d      |
| {[Cu(hfac) <sub>2</sub> ][NIT-4-OMe-4PyPh] <sub>2</sub> [Tb(hfac) <sub>3</sub> ]} <sub>n</sub>                                                        | luminescent probe     | Slow magnetic relaxation |                | This work |
